# Supplementary material for: Ginelfite, Ag2(Ag0.5Fe0.5)TlPb24.5(Sb,As)32.5S75.5, a new boxwork sulfosalt from Jas Roux, France: occurrence and crystal structure
Source: Copernicus journal article supplement (doi:10.5194/ejm-37-319-2025), 2025-05-21
Supplement: Supplementary file 1 [file ejm-37-319-2025-supplement.zip]

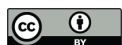

*Supplement of*

**Ginelfite,  $\text{Ag}_2(\text{Ag}_{0.5}\text{Fe}_{0.5})\text{TiPb}_{24.5}(\text{Sb,As})_{32.5}\text{S}_{75.5}$ , a new boxwork sulfosalt from Jas Roux, France: occurrence and crystal structure**

**Cristian Biagioni et al.**

*Correspondence to:* Cristian Biagioni ([cristian.biagioni@unipi.it](mailto:cristian.biagioni@unipi.it))

- [ejm-37-319-2025-supplement-title-page.pdf](#)
- [ginelfite.cif](#)

The copyright of individual parts of the supplement might differ from the article licence.
